# Supplementary material for: Maternal T cells limit engraftment after in utero hematopoietic cell transplantation in mice
Source: JCI journal article supplement (doi:10.1172/jci44907), 2011-01-18
Supplement: sd1 [file 1]

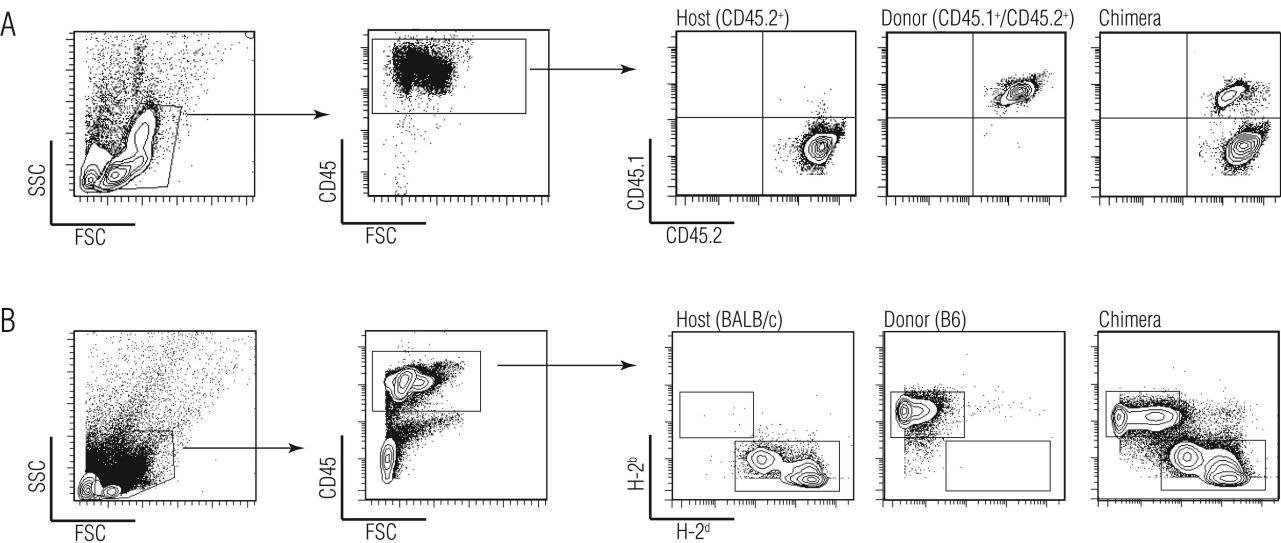

**Supplementary Figure 1: Determination of chimerism among fetal liver (FL) recipients.** The percentage of circulating donor leukocytes in recipient mice was determined 4 weeks after in utero transplantation of (A) congenic or (B) allogeneic FL cells. (A) Congenic B6 (Donor, CD45.1<sup>+</sup>/CD45.2<sup>+</sup>) FL was transplanted into B6 (Host, CD45.2<sup>+</sup>) fetuses and flow cytometric analysis was used to identify donor leukocytes in recipient animals. (B) For allogeneic transplants, B6 (Donor, H-2<sup>b</sup>) FL was transplanted into BALB/c (Host, H-2<sup>d</sup>) fetuses.

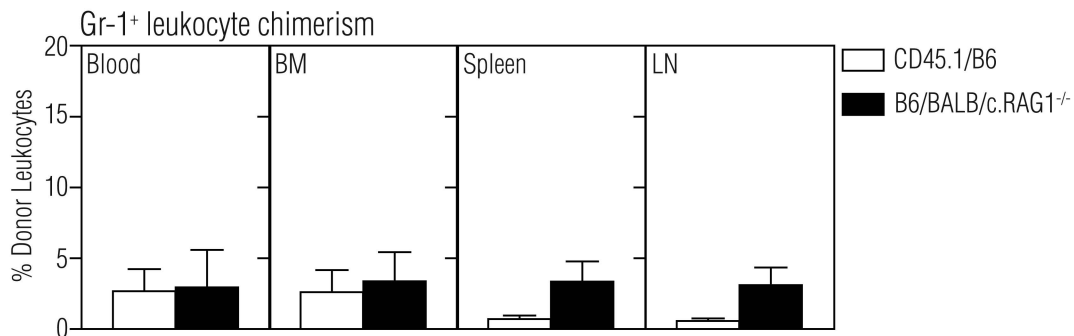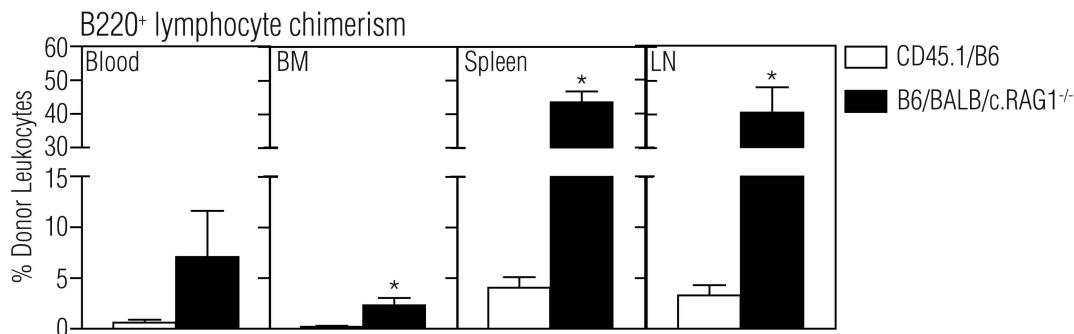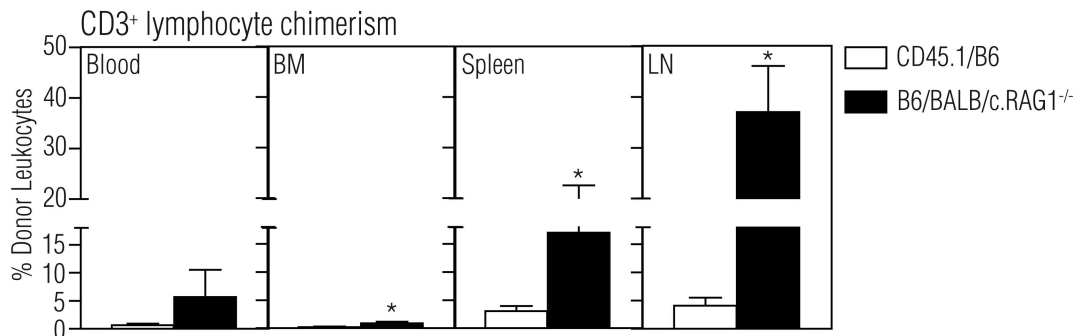

**Supplementary Figure 2: Higher overall chimerism levels in immunodeficient hosts are due to increased chimerism in lymphoid, but not granulocyte, compartments.** Lymphoid tissues were harvested from either wild-type (CD45.1/B6, n≥5) or immunodeficient recipients (B6/BALB/c.RAG1<sup>-/-</sup>, n≥3) 43 to 57 weeks after in utero transplantation. The chimerism level of individual leukocyte subsets was calculated by dividing the total number of donor Gr-1<sup>+</sup> granulocytes, B220<sup>+</sup> B cells, or CD3<sup>+</sup> T cells by the total number of leukocytes found in recipient bone marrow (BM), spleen, lymph node (LN), or blood. Significantly higher levels of CD3<sup>+</sup> and B220<sup>+</sup> leukocyte chimerism were observed in immunodeficient recipients compared to wild-type recipients in all tissues except for blood. \*p<0.05 by t-test.

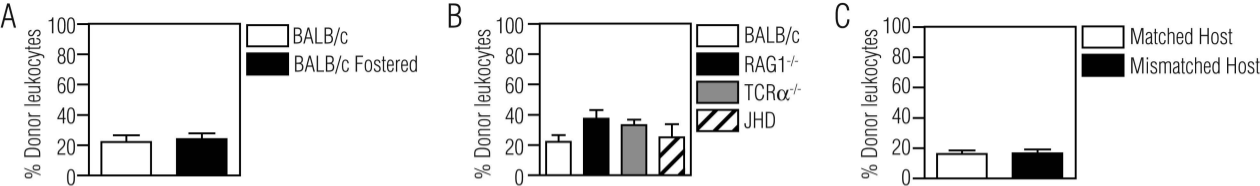

**Supplementary Figure 3: Levels of chimerism among fetal liver (FL) recipients.** The percentage of donor leukocytes in chimeras was determined 4 weeks after in utero transplantation of allogeneic FL cells. **(A)** Levels of chimerism in non-fostered (BALB/c, n=16) and fostered (BALB/c Fostered, n=13) pups that were born to wild-type BALB/c parents. **(B)** Levels of chimerism in pups that were born to wild-type BALB/c fathers and either wild-type BALB/c (n=16) or immunodeficient mothers (RAG1<sup>-/-</sup>, n=12; TCRα<sup>-/-</sup>, n=19; JHD, n=5). **(C)** Donor hematopoietic cells were MHC-matched to pregnant mothers. Levels of chimerism after IUHCTx are shown among fetuses that are MHC matched (matched host, n=11) or mismatched (mismatched host, n=10) to the donor graft.
